# Supplementary material for: DANPY (dimethylaminonaphthylpyridinium): an economical and biocompatible fluorophore
Source: Royal Society of Chemistry journal article supplement (doi:10.1039/c8ob02536c), 2019-01-01
Supplement: c8ob02536c2.pdf [file c8ob02536c2.pdf]

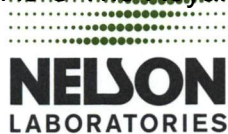

Sponsor:  
Rose Cattolico  
University of Washington  
P.O. Box 355640  
Seattle, WA 98195

## MEM Elution GLP Report

Test Article: 1) DLE-14-48-1  
2) Buffer Control Solution  
Purchase Order: EI600881  
Study Number: 864525-S01  
Study Received Date: 21 Dec 2015  
Test Procedure(s): Standard Test Protocol (STP) Number: STP0032 Rev 09  
Protocol Detail Sheet (PDS) Number: 201504884 Rev 01

**Summary:** The Minimal Essential Media (MEM) Elution test was designed to determine the cytotoxicity of extractable substances. The test article was added to cell monolayers and incubated. The cell monolayers were examined and scored based on the degree of cellular destruction. All test method acceptance criteria were met. The test procedure(s) listed above were followed without deviation.

### Results:

#### Test Article:

| Identification | Dilution      | Results<br>Pass/Fail | Scores |    |    |         |
|----------------|---------------|----------------------|--------|----|----|---------|
|                |               |                      | #1     | #2 | #3 | Average |
| Test Article 1 | Full Strength | Fail                 | 3      | 3  | 3  | 3       |
|                | 1:2           | Pass                 | 2      | 2  | 2  | 2       |
|                | 1:4           | Pass                 | 1      | 1  | 1  | 1       |
|                | 1:8           | Pass                 | 1      | 1  | 1  | 1       |
|                | 1:16          | Pass                 | 1      | 1  | 1  | 1       |
| Test Article 2 | Full Strength | Pass                 | 2      | 2  | 2  | 2       |
|                | 1:2           | Pass                 | 1      | 1  | 1  | 1       |
|                | 1:4           | Pass                 | 0      | 0  | 0  | 0       |
|                | 1:8           | Pass                 | 0      | 0  | 0  | 0       |
|                | 1:16          | Pass                 | 0      | 0  | 0  | 0       |

*Bobbi Rushton Castro*

Study Director

Bobbi L. Rushton-Castro

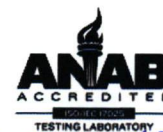

*04 Jan 2016*

Study Completion Date

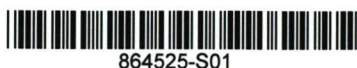

864525-S01

Controls:

| Identification                              | Scores |    |    |         | Extraction Ratio | Amount Tested /<br>Extraction Solvent<br>Amount |
|---------------------------------------------|--------|----|----|---------|------------------|-------------------------------------------------|
|                                             | #1     | #2 | #3 | Average |                  |                                                 |
| Negative Control -<br>Polypropylene Pellets | 0      | 0  | 0  | 0       | 0.2 g/mL         | 4 g / 20 mL                                     |
| Media Control                               | 0      | 0  | 0  | 0       | N/A              | 20 mL                                           |
| Positive Control -<br>Latex Natural Rubber  | 4      | 4  | 4  | 4       | 0.2 g/mL         | 4 g / 20 mL                                     |

**Acceptance Criteria:** The United States Pharmacopeia & National Formulary (USP <87>) states that the test article meets the requirements, or receives a passing score (**Pass**) if the reactivity grade is not greater than grade 2 or a mild reactivity. The ANSI/AAMI/ISO 10993-5 standard states that the achievement of a numerical grade greater than 2 is considered a cytotoxic effect, or a failing score (**Fail**).

Nelson Laboratories acceptance criteria was based upon the negative and media controls receiving "0" reactivity grades and positive controls receiving a 3-4 reactivity grades (moderate to severe). The test was considered valid as the control results were within acceptable parameters.

The cell monolayers were examined microscopically. The wells were scored as to the degree of discernable morphological cytotoxicity on a relative scale of 0 to 4:

| Conditions of All Cultures                                                          | Reactivity | Grade |
|-------------------------------------------------------------------------------------|------------|-------|
| No cell lysis, intracytoplasmic granules.                                           | None       | 0     |
| Less than or equal to 20% rounding, occasional lysed cells.                         | Slight     | 1     |
| Greater than 20% to less than or equal to 50% rounding,<br>no extensive cell lysis. | Mild       | 2     |
| Greater than 50% to less than 70% rounding and lysed cells.                         | Moderate   | 3     |
| Nearly complete destruction of the cell layers.                                     | Severe     | 4     |

The results from the three wells were averaged to give a final cytotoxicity score.

**Procedure:** The liquid test articles were tested by combining 16 mL of test article with a 4 mL aliquot of 5X MEM + 50% bovine calf serum. The pH was adjusted with 7.5% Sodium Bicarbonate. Multiple well cell culture plates were seeded with a verified quantity of industry standard L-929 cells (ATCC CCL-1) and incubated until approximately 80% confluent. The test articles and control extracts were added to the cell monolayers in triplicate. The cells were incubated at 37 ± 1°C with 5 ± 1% CO<sub>2</sub> for 48 ± 3 hours.

## Quality Assurance Statement

**Compliance Statement:** The test was conducted in accordance with the USFDA (21 CFR Part 58) Regulations. This final report reflects the raw data.

| Activity                                               | Date        |
|--------------------------------------------------------|-------------|
| Study Initiation                                       | 28 Dec 2015 |
| Phase Inspected by Quality Assurance:<br>Cell Exposure | 31 Dec 2015 |
| Audit Results Reported to Study Director               | 03 Jan 2016 |
| Audit Results Reported to Management                   | 04 Jan 2016 |

| Scientists           | Title          |
|----------------------|----------------|
| Chad Summers         | Supervisor     |
| Bobbi Rushton-Castro | Study Director |

**Data Disposition:** The study plan, raw data and final report from this study are archived at NLI or an approved off-site location.

  
\_\_\_\_\_  
Quality Assurance

04 Jan 2016  
\_\_\_\_\_  
Date
